# Supplementary material
Source: PubMed Central journal article supplement (PMC10330871)
Supplement: NIHMS1908797-supplement-7.pdf [file NIHMS1908797-supplement-7.pdf]

## Supplemental Reference

1. Stringer, C., Wang, T., Michaelos, M., and Pachitariu, M. (2021). Cellpose: a generalist algorithm for cellular segmentation. *Nat Methods* 18, 100–106. [10.1038/s41592-020-01018-x](https://doi.org/10.1038/s41592-020-01018-x).
2. Monge, G. (1781). *Mémoire sur la théorie des déblais et des remblais* (De l'Imprimerie Royale).
3. Kantorovitch, L. (1958). On the Translocation of Masses. *Management Science* 5, 1–4.
4. Flamary, R., Courty, N., Gramfort, A., Alaya, M.Z., Boisbunon, A., Chambon, S., Chapel, L., Corenflos, A., Fatras, K., Fournier, N., et al. (2021). POT: Python Optimal Transport. *Journal of Machine Learning Research* 22, 1–8.
5. Ahuja, R.K., Magnanti, T.L., and Orlin, J.B. (1993). *Network flows: Theory, algorithms and applications*. New Jersey: Rentice-Hall.
6. Kusumi, A., Fujiwara, T.K., Chadda, R., Xie, M., Tsunoyama, T.A., Kalay, Z., Kasai, R.S., and Suzuki, K.G.N. (2012). Dynamic organizing principles of the plasma membrane that regulate signal transduction: commemorating the fortieth anniversary of Singer and Nicolson's fluid-mosaic model. *Annu Rev Cell Dev Biol* 28, 215–250. [10.1146/annurev-cellbio-100809-151736](https://doi.org/10.1146/annurev-cellbio-100809-151736).
7. Seifert, U. (1995). The concept of effective tension for fluctuating vesicles. *Z. Physik B - Condensed Matter* 97, 299–309. [10.1007/BF01307480](https://doi.org/10.1007/BF01307480).
8. Evans, E., and Rawicz, W. (1990). Entropy-driven tension and bending elasticity in condensed-fluid membranes. *Phys. Rev. Lett.* 64, 2094–2097. [10.1103/PhysRevLett.64.2094](https://doi.org/10.1103/PhysRevLett.64.2094).
9. Fournier, J.-B., Ajdari, A., and Peliti, L. (2001). Effective-Area Elasticity and Tension of Micromanipulated Membranes. *Phys. Rev. Lett.* 86, 4970–4973. [10.1103/PhysRevLett.86.4970](https://doi.org/10.1103/PhysRevLett.86.4970).
10. Turlier, H., Fedosov, D.A., Audoly, B., Auth, T., Gov, N.S., Sykes, C., Joanny, J.-F., Gompper, G., and Betz, T. (2016). Equilibrium physics breakdown reveals the active nature of red blood cell flickering. *Nature Phys* 12, 513–519. [10.1038/nphys3621](https://doi.org/10.1038/nphys3621).
11. Kelkar, M., Bohec, P., and Charras, G. (2020). Mechanics of the cellular actin cortex: From signalling to shape change. *Current Opinion in Cell Biology* 66, 69–78. [10.1016/j.ceb.2020.05.008](https://doi.org/10.1016/j.ceb.2020.05.008).
12. Kruse, K., Joanny, J.F., Jülicher, F., Prost, J., and Sekimoto, K. (2005). Generic theory of active polar gels: a paradigm for cytoskeletal dynamics. *Eur. Phys. J. E* 16, 5–16. [10.1140/epje/e2005-00002-5](https://doi.org/10.1140/epje/e2005-00002-5).

13. Turlier, H., Audoly, B., Prost, J., and Joanny, J.-F. (2014). Furrow Constriction in Animal Cell Cytokinesis. *Biophys J* *106*, 114–123. 10.1016/j.bpj.2013.11.014.
14. Tlili, S., Gay, C., Graner, F., Marcq, P., Molino, F., and Saramito, P. (2015). Colloquium: Mechanical formalisms for tissue dynamics. *Eur. Phys. J. E* *38*, 33. 10.1140/epje/i2015-15033-4.
15. Sens, P., and Plastino, J. (2015). Membrane tension and cytoskeleton organization in cell motility. *J Phys Condens Matter* *27*, 273103. 10.1088/0953-8984/27/27/273103.
16. Brochard-Wyart, F., Borghi, N., Cuvelier, D., and Nassoy, P. (2006). Hydrodynamic narrowing of tubes extruded from cells. *Proceedings of the National Academy of Sciences* *103*, 7660–7663. 10.1073/pnas.0602012103.
17. Alert, R., Casademunt, J., Brugués, J., and Sens, P. (2015). Model for probing membrane-cortex adhesion by micropipette aspiration and fluctuation spectroscopy. *Biophys J* *108*, 1878–1886. 10.1016/j.bpj.2015.02.027.
18. Clark, A.G., Dierkes, K., and Paluch, E.K. (2013). Monitoring actin cortex thickness in live cells. *Biophys J* *105*, 570–580. 10.1016/j.bpj.2013.05.057.
