# Supplementary material
Source: PubMed Central journal article supplement (PMC10330871)

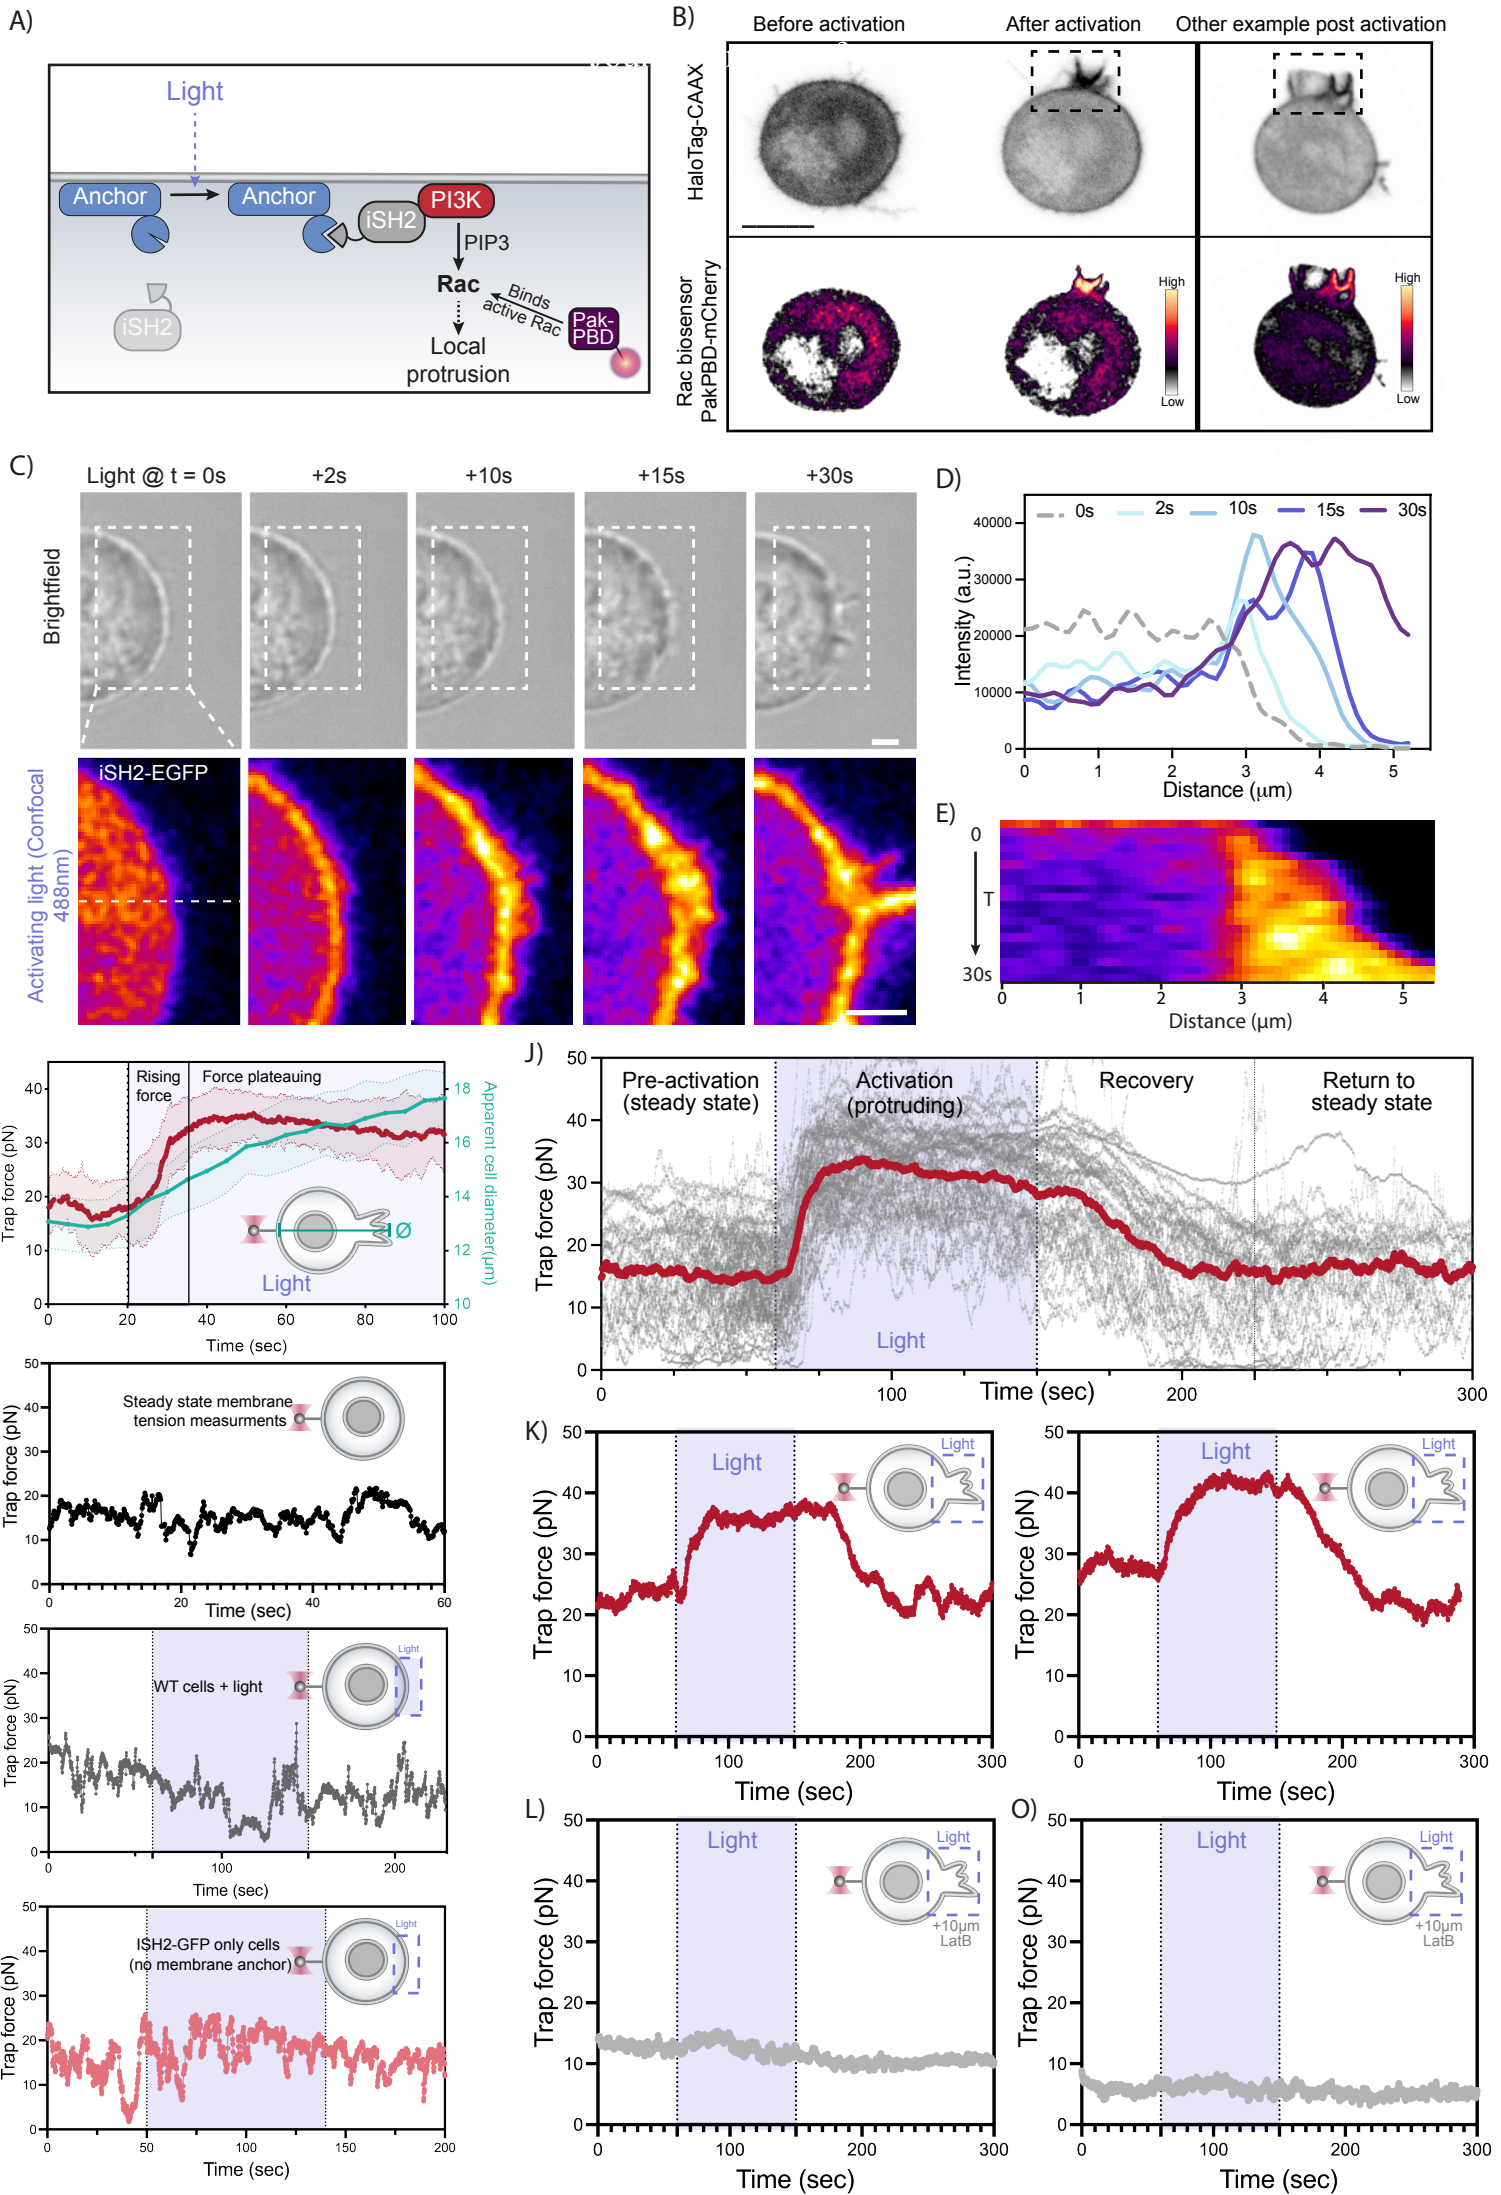

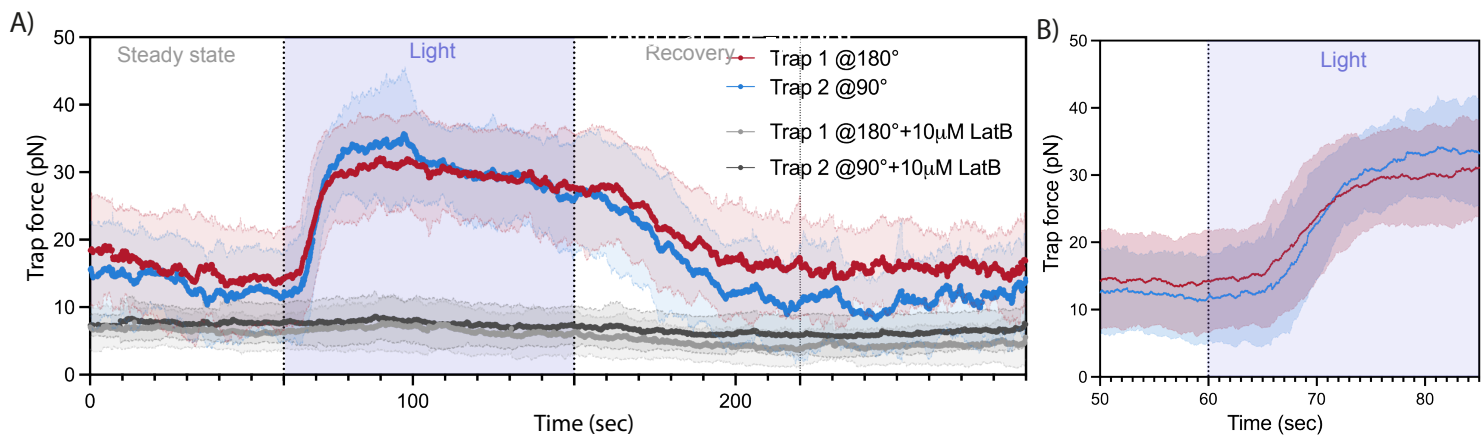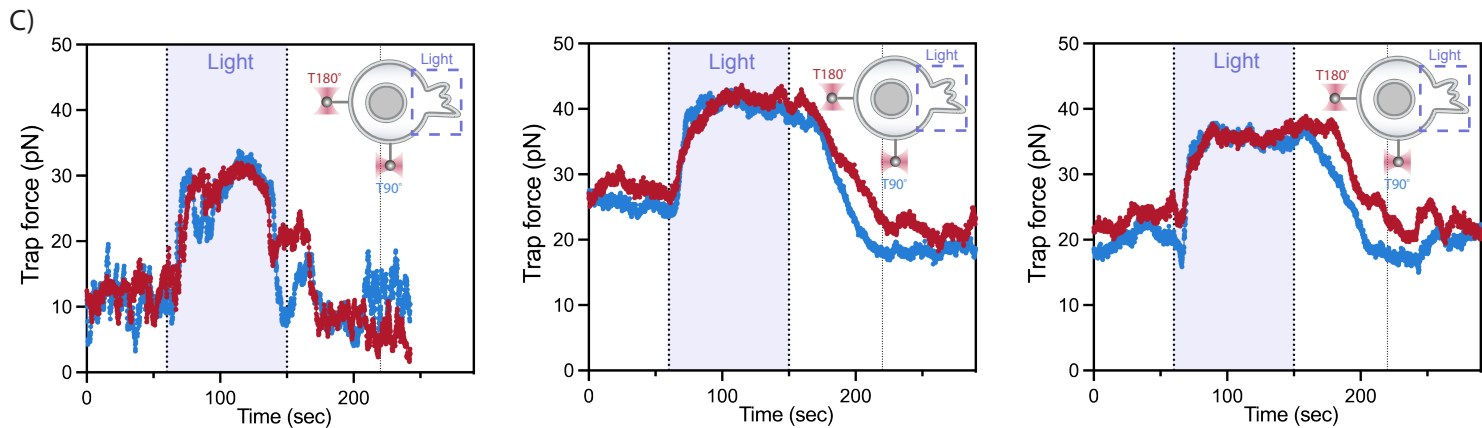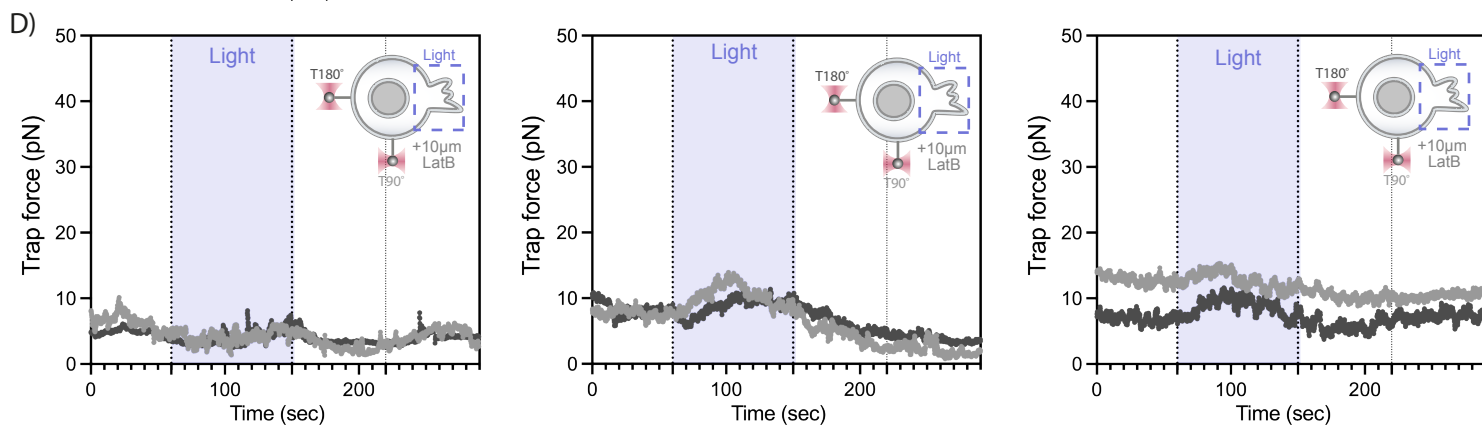



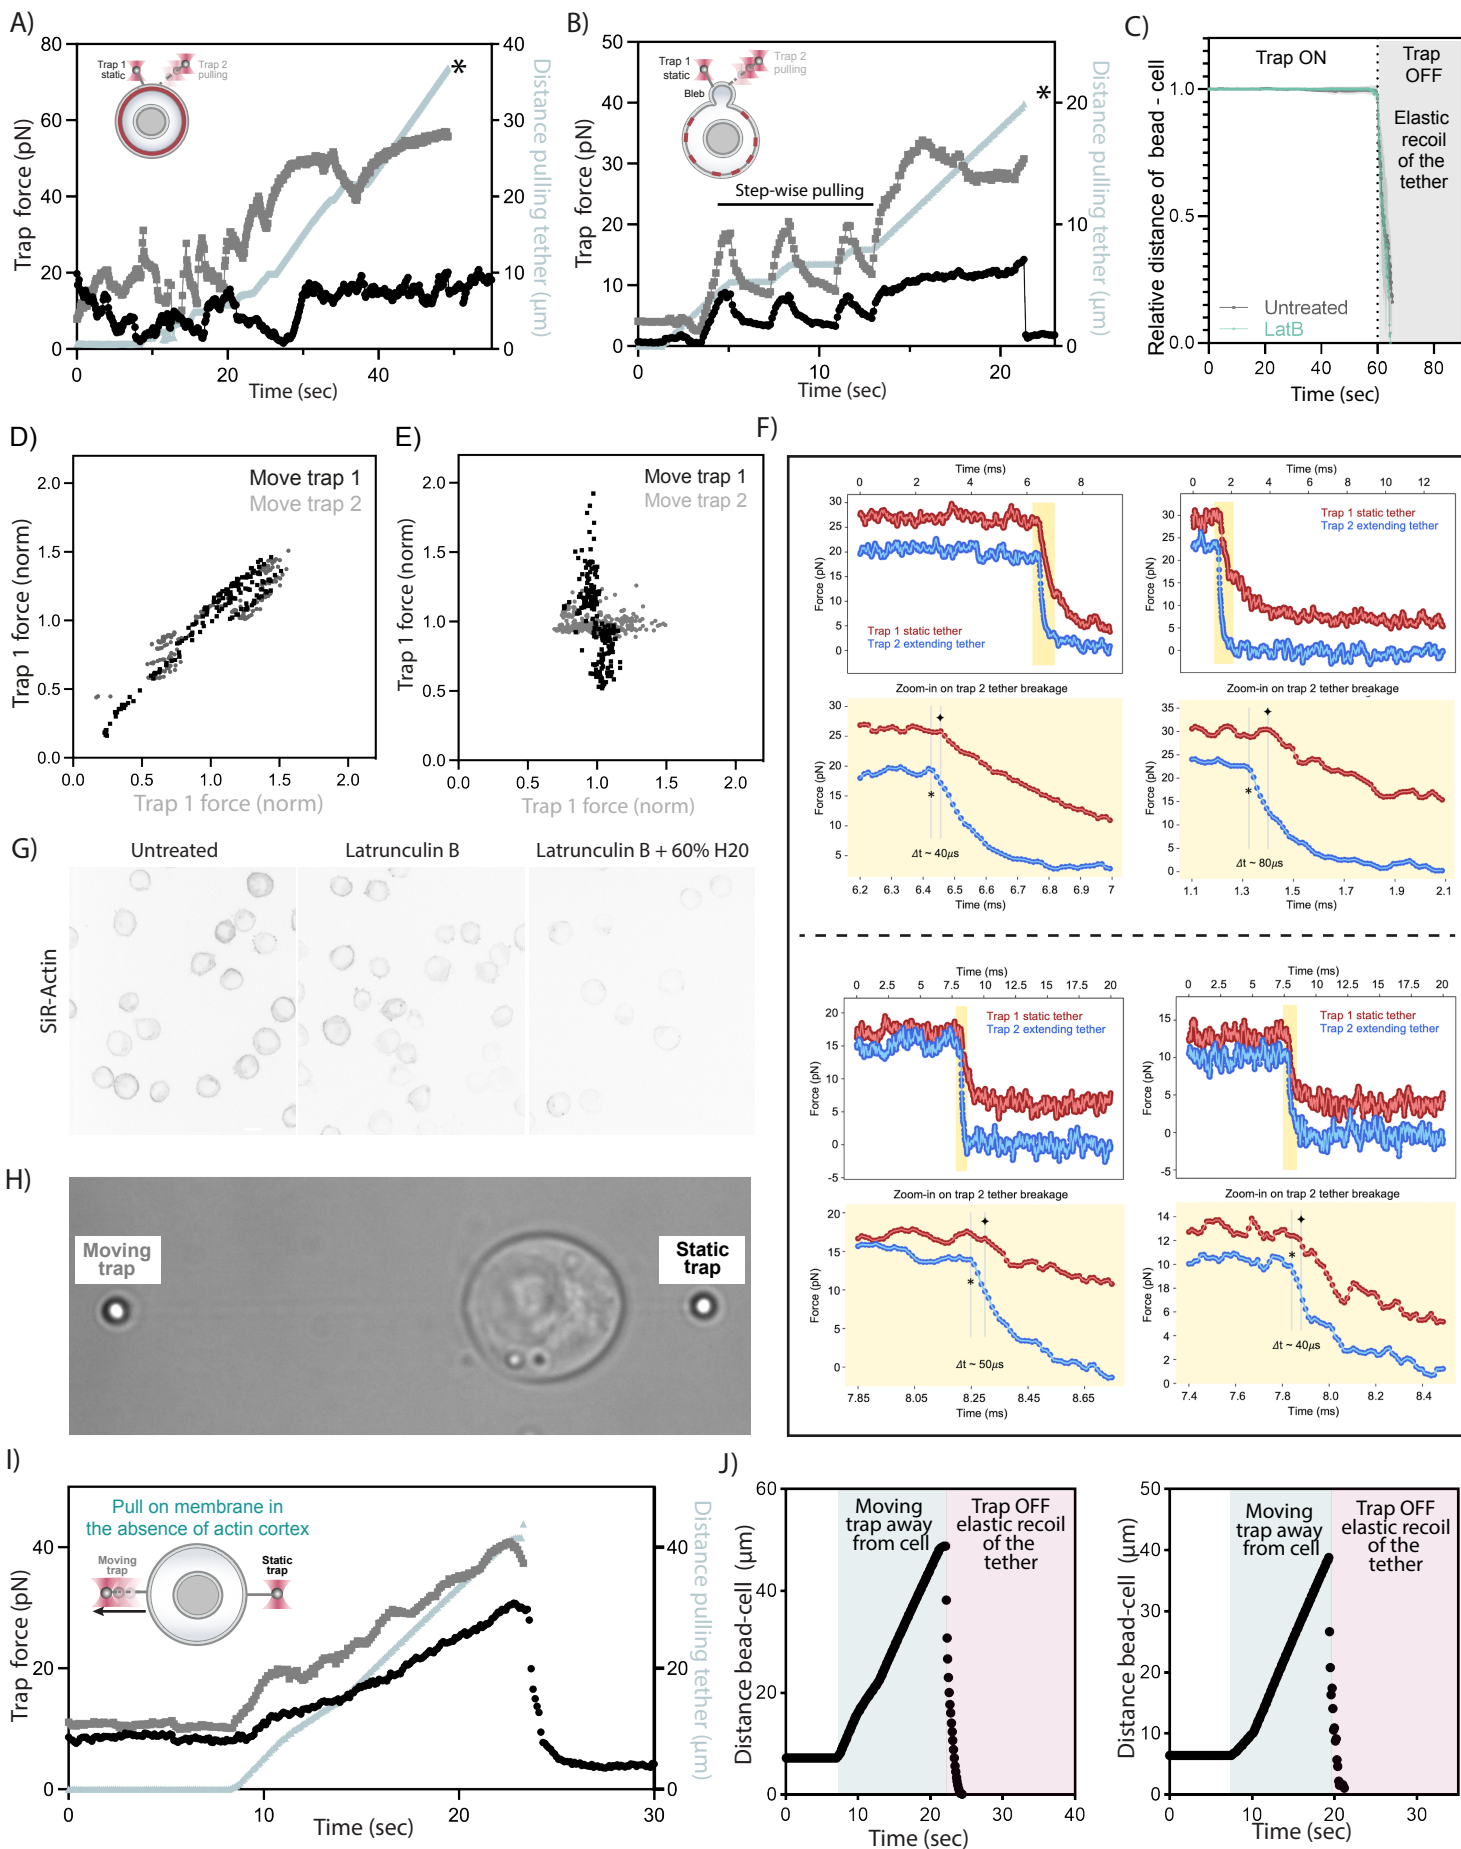

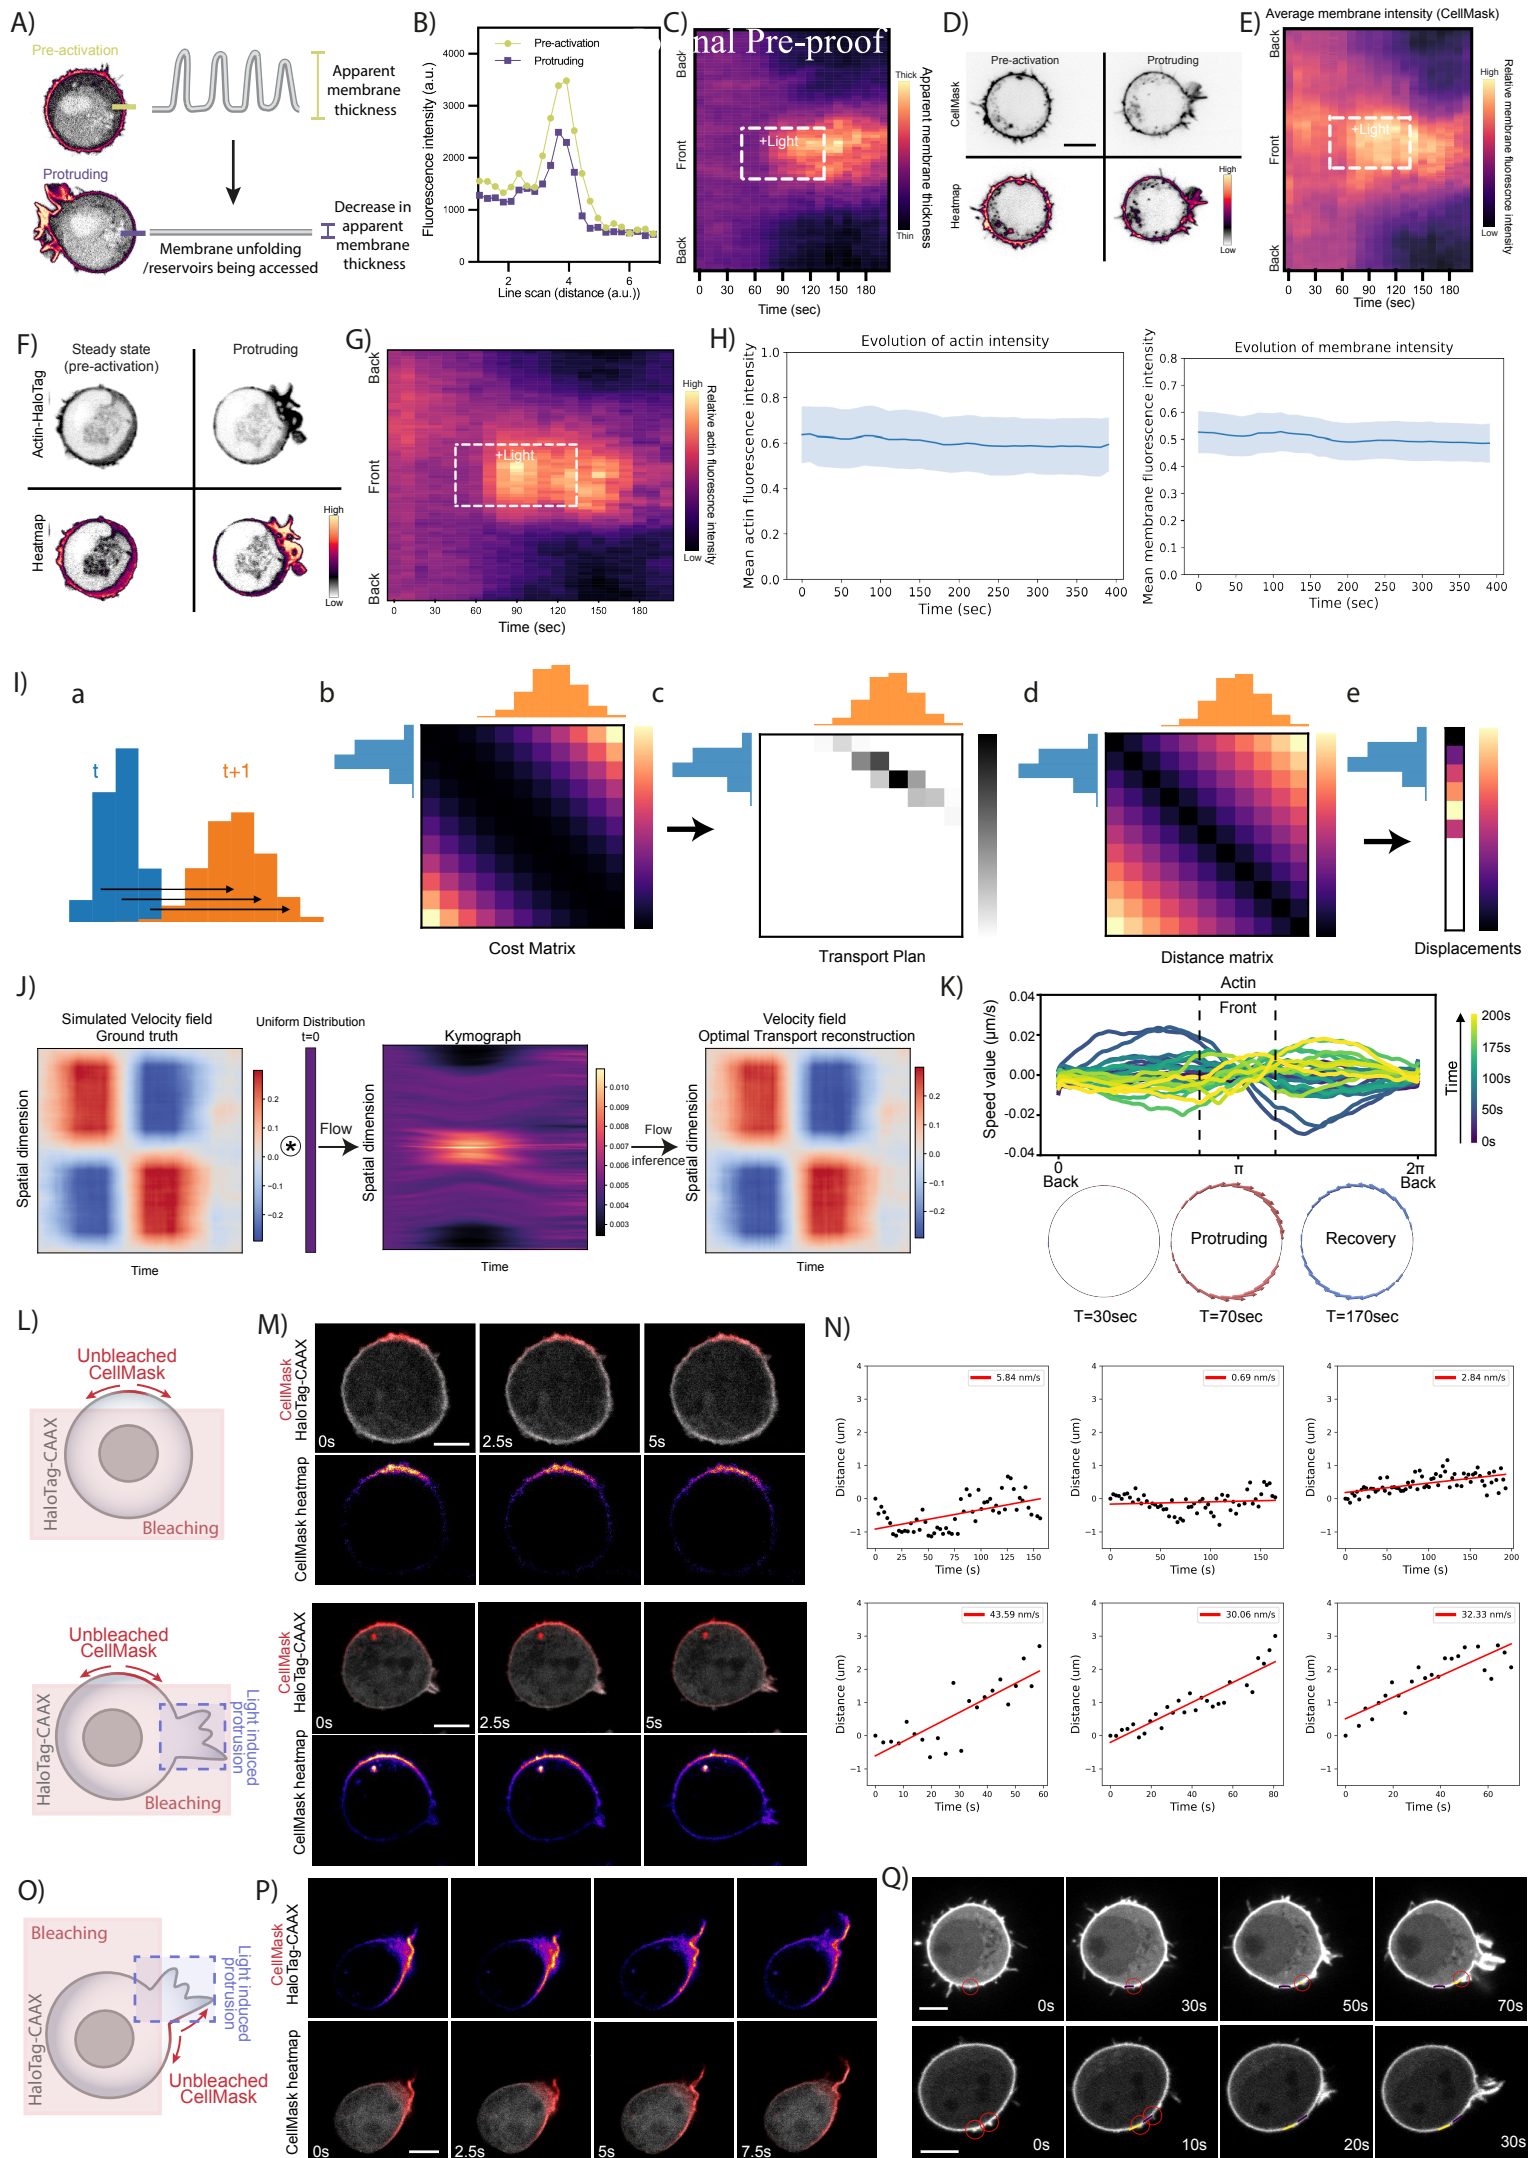

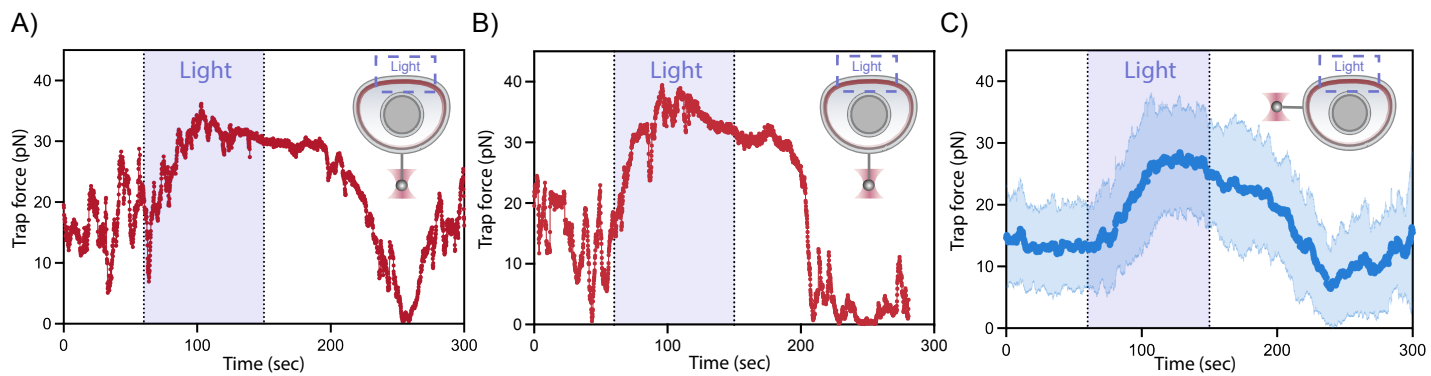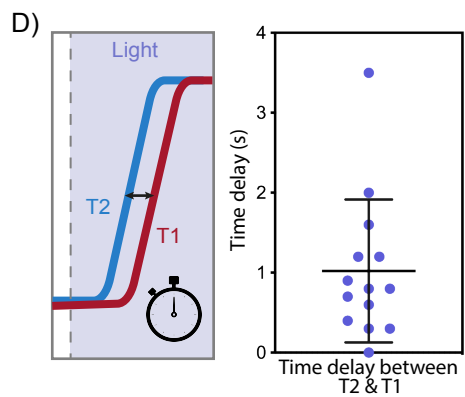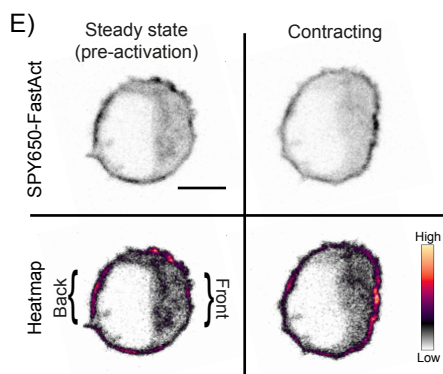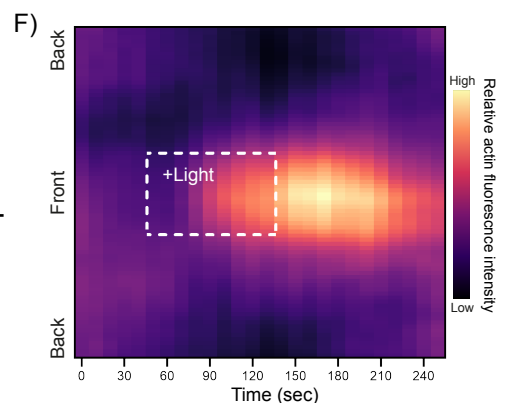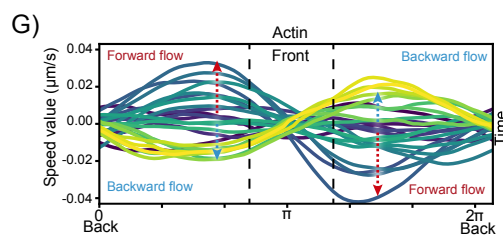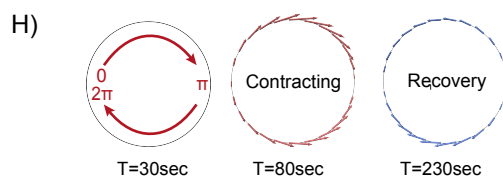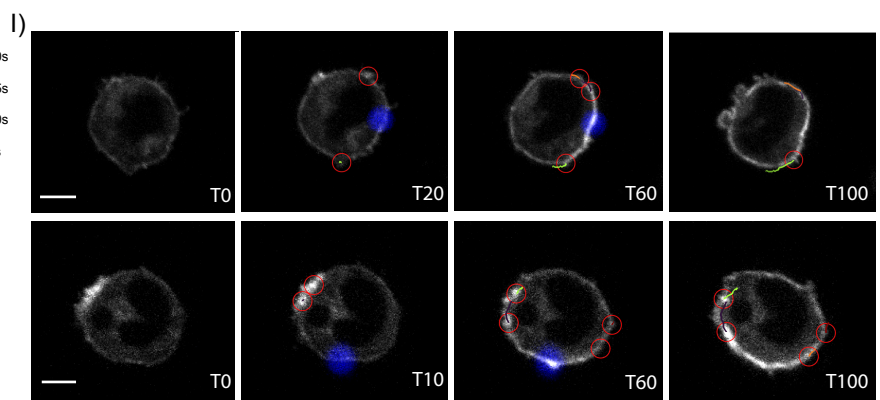

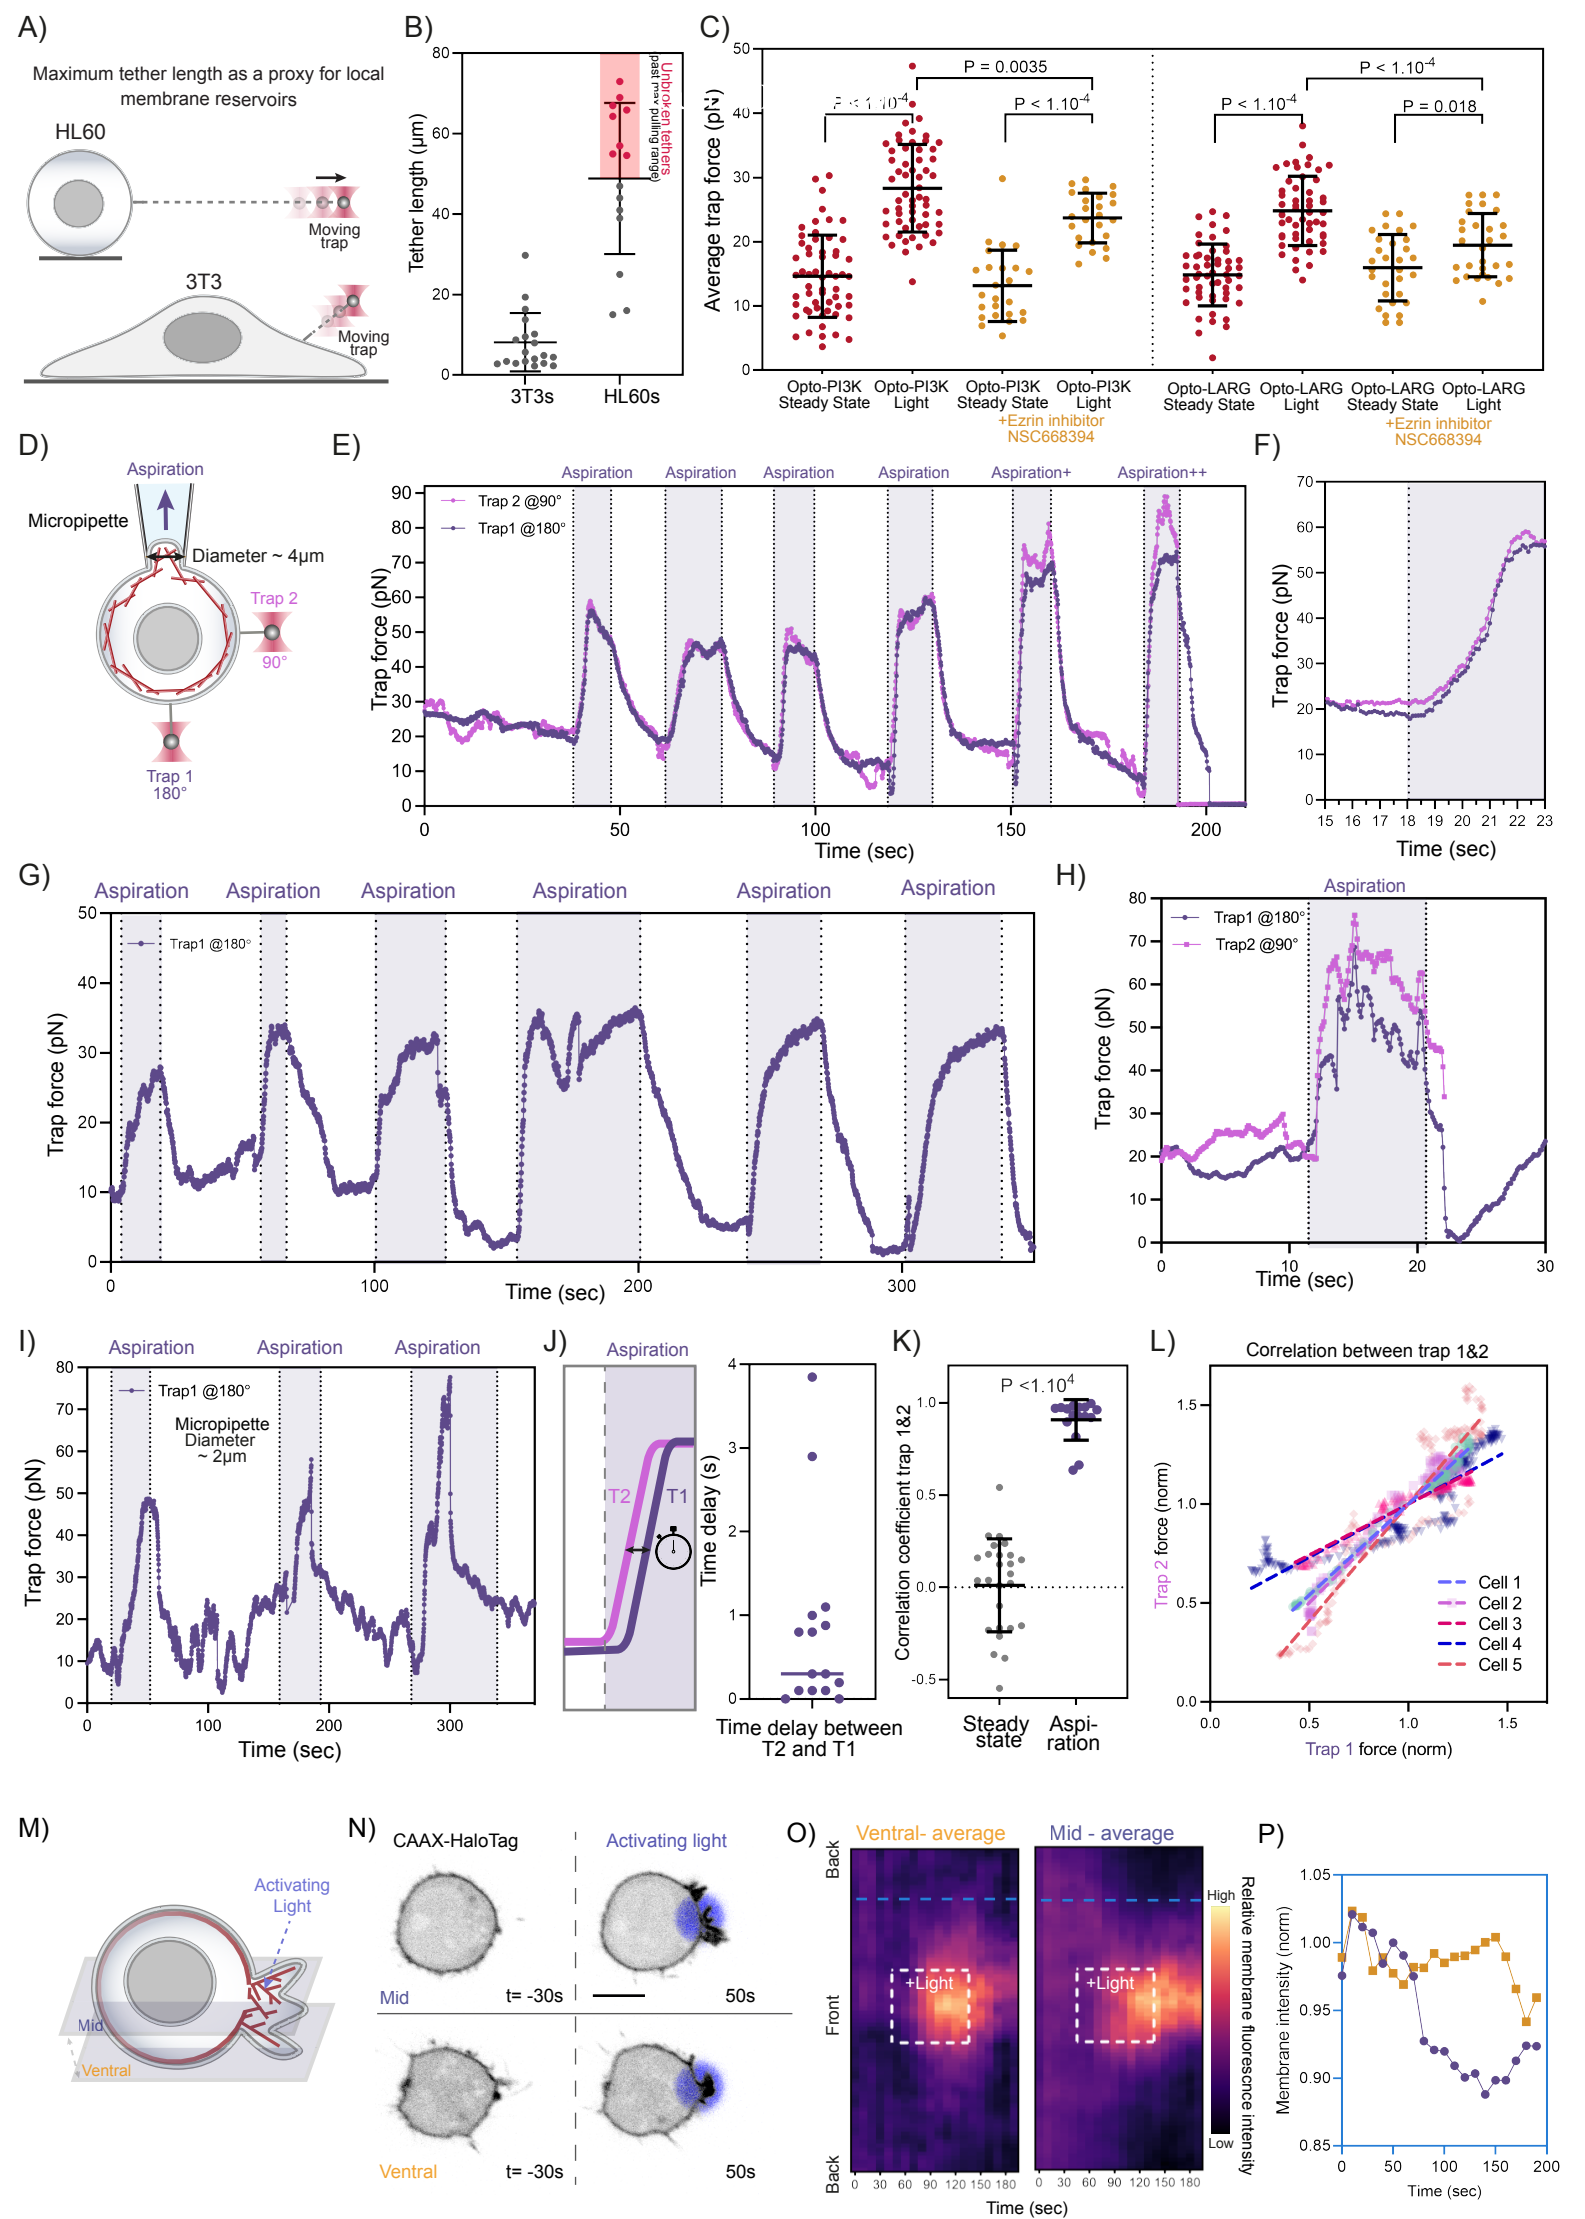

Supplement: NIHMS1908797-supplement-8.pdf [file NIHMS1908797-supplement-8.pdf]
